# Supplementary material for: Ultraslow relaxation of the structure at the ionic liquid|gold electrode interface to a potential step probed by electrochemical surface plasmon resonance measurements: asymmetry of the relaxation time to the potential-step direction
Source: Royal Society of Chemistry journal article supplement (doi:10.1039/c3cp51463c), 2013-01-01
Supplement: c3cp51463c.pdf [file c3cp51463c.pdf]

## ARTICLE INFORMATION

Journal: Physical Chemistry Chemical Physics

All Authors: Naoya Nishi, Yuta Hirano, Toshiyuki Motokawa, and Takashi Kakiuchi

Title: Ultraslow relaxation of the structure at the ionic liquid|gold electrode interface to a potential step probed by electrochemical surface plasmon resonance measurements: asymmetry of the relaxation time to the potential-step direction

## Electronic Supplementary Information

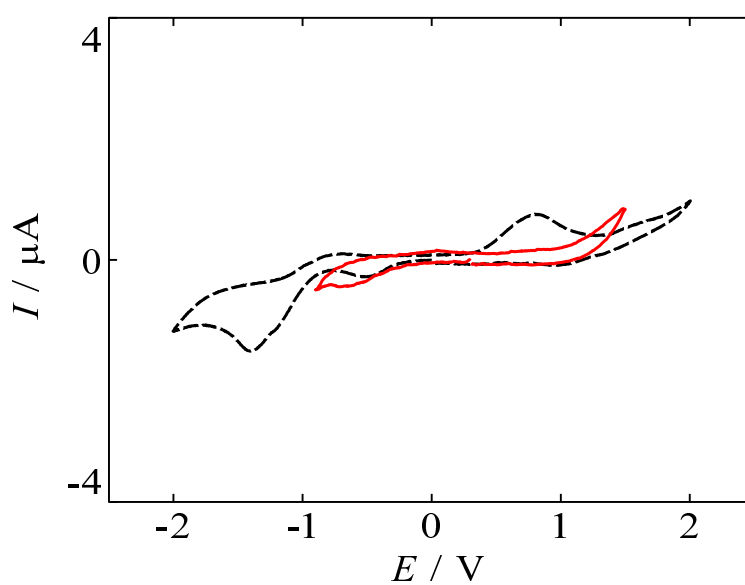

Figure S1: Cyclic voltammograms at the [TOMA<sup>+</sup>][C<sub>4</sub>C<sub>4</sub>N<sup>-</sup>]gold interface for the capacitive potential region at 50 mV/s (red solid line) and for the potential window at 20 mV/s (black dotted line).

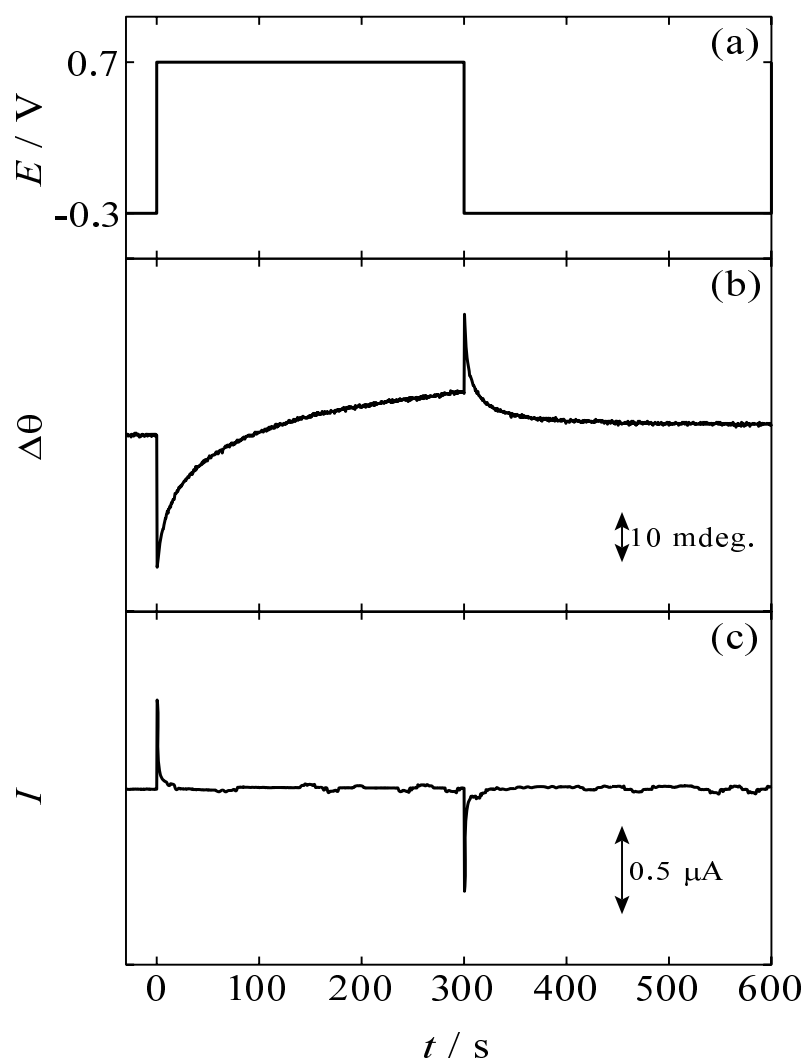

Figure S2: Time course of (a) the potential, (b) SPR angle shift and (c) the current during the potential step measurements.

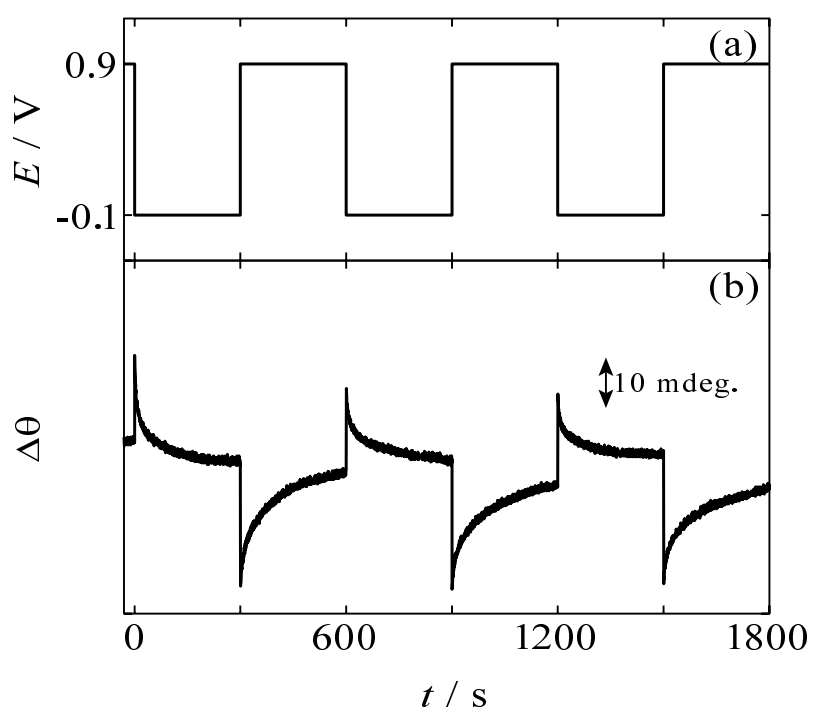

Figure S3: Time course of (a) the potential and (b) SPR angle shift during the potential step measurements between +0.9 and -0.1 V.

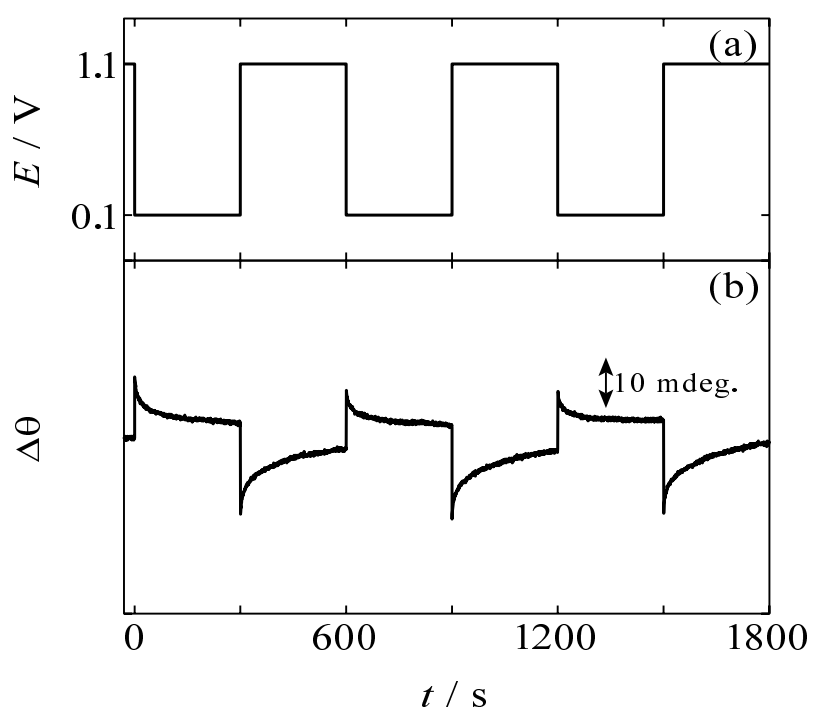

Figure S4: Time course of (a) the potential and (b) SPR angle shift during the potential step measurements between +1.1 and +1.1 V.
